# Supplementary material for: Precipitation at Room Temperature as a Fast and Versatile Method for Calcium Phosphate/TiO2 Nanocomposites Synthesis
Source: MDPI journal article supplement (doi:10.3390/nano11061523), 2021-06-09
Supplement: s1 [file s1]

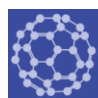

Supplementary information for

# Precipitation at Room Temperature as a Fast and Versatile Method for Calcium Phosphate/TiO<sub>2</sub> Nanocomposites Synthesis

Ina Erceg <sup>1</sup>, Atida Selmani <sup>1</sup>, Andreja Gajović <sup>2</sup>, Borna Radatović <sup>3</sup>, Suzana Šegota <sup>1</sup>, Marija Ćurlin <sup>4</sup>, Vida Strasser <sup>1</sup>, Jasminka Kontrec <sup>5</sup>, Damir Kralj <sup>5</sup>, Nadica Maltar-Strmečki <sup>6</sup>, Rinea Barbir <sup>7</sup>, Barbara Pem <sup>7</sup>, Ivana Vinković Vrček <sup>7</sup> and Maja Dutour Sikirić <sup>1,\*</sup>

<sup>1</sup> Laboratory for Biocolloids and Surface Chemistry, Ruđer Bošković Institute, Bijenička Cesta 54, 10 000 Zagreb, Croatia; ierceg@irb.hr (I.E.); aselmani@irb.hr (A.S.); ssegota@irb.hr (S.Š.); Vida.Strasser@irb.hr (V.S.)

<sup>2</sup> Laboratory for Energy Conversion Materials and Sensors, Ruđer Bošković Institute, Bijenička Cesta 54, 10000 Zagreb, Croatia; gajovic@irb.hr

<sup>3</sup> Institute of Physics, Bijenička Cesta 46, 10000 Zagreb, Croatia; bradatovic@ifs.hr

<sup>4</sup> Department of Histology and Embryology, School of Medicine, University of Zagreb, Šalata 3, 10000 Zagreb, Croatia; marija.curlin@mef.hr

<sup>5</sup> Laboratory for Precipitation Processes, Ruđer Bošković Institute, Bijenička Cesta 54, 10000 Zagreb, Croatia; lugaric@irb.hr (J.K.); kralj@irb.hr (D.K.)

<sup>6</sup> Laboratory for Magnetic Resonances, Ruđer Bošković Institute, Bijenička cesta 54, 10000 Zagreb, Croatia; nstrm@irb.hr

<sup>7</sup> Institute for Medical Research and Occupational Health, Ksaverska Cesta 2, Zagreb, 10000, Croatia; rbarbir@imi.hr (R.B.); bpem@imi.hr (B.P.); ivinkovic@imi.hr (I.V.V.)

\* Correspondence: sikiric@irb.hr; Tel.: +385-1-456-0941

## Content of listed material:

**Figure SI 1.** Volume size distributions of TiNPLs (a,b) and TiNWs (c,d) in c-SBF (a,c) and anionic reactant solution ( $c(\text{Na}_2\text{HPO}_4) = 8 \cdot 10^{-3} \text{ mol dm}^{-3}$ ,  $\text{pH}_{\text{init}} = 7.4$ ,  $\vartheta = (25.0 \pm 0.1)^\circ\text{C}$ ).

**Figure SI 2.** Representative pH vs time curves obtained in the control system (without TiO<sub>2</sub> nanomaterials) and in the presence of different concentrations of TiO<sub>2</sub> a) nanoplates (TiNPLs) and b) nanowires (TiNWs).  $c(\text{CaCl}_2) = c(\text{Na}_2\text{HPO}_4) = 4 \cdot 10^{-3} \text{ mol dm}^{-3}$ ,  $\text{pH}_{\text{init}} = 7.4$ ,  $\vartheta = (25 \pm 0.1)^\circ\text{C}$ .

**Table SI 1.** Average induction time obtained from pH vs time curves from 3 measurements with standard deviations in the control system (without TiO<sub>2</sub> nanomaterials) and in the presence of different concentrations of TiO<sub>2</sub> nanoplates (TiNPLs) and nanowires (TiNWs).  $c(\text{CaCl}_2) = c(\text{Na}_2\text{HPO}_4) = 4 \cdot 10^{-3} \text{ mol dm}^{-3}$ ,  $\text{pH}_{\text{init}} = 7.4$ ,  $\vartheta = (25.0 \pm 0.1)^\circ\text{C}$ .

**Figure SI 3.** SEM micrographs of the calcium deficient hydroxyapatite (CaDHA) formed in control system after 60 min reaction time.  $c(\text{CaCl}_2) = c(\text{Na}_2\text{HPO}_4) = 4 \cdot 10^{-3} \text{ mol dm}^{-3}$ ,  $\text{pH}_{\text{init}} = 7.4$ ,  $\vartheta = (25 \pm 0.1)^\circ\text{C}$ .

**Figure SI 4.** Simulated (red) and experimental (dark) EPR spectra of gamma irradiated precipitates formed after 60 min reaction time in control system (calcium deficient hydroxyapatite, CaDHA) and in the presence of 100 mg L<sup>-1</sup> TiO<sub>2</sub> nanoplates (CaDHA/TiNPLs), and nanowires (CaDHA/TiNWs).

**Table SI 2.** EPR spectral parameters extracted by simulation of experimental spectra according to Figures 8 and SI 4 for precipitates formed after 60 min reaction time in control system (calcium deficient hydroxyapatite, CaDHA) and in the presence of 100 mg L<sup>-1</sup> TiO<sub>2</sub> nanoplates (CaDHA/TiNPLs), and nanowires (CaDHA/TiNWs).

**Figure SI 5.** The intensity of DCF fluorescence after incubation in PBS with different concentrations of SIN-1 (NC – negative control; PC – positive control) used for comparison with a) TiO<sub>2</sub> nanoparticles (TiNPs), titanate nanotubes (TiNTs), TiO<sub>2</sub> nanowires (TiNWs), and TiO<sub>2</sub> nanoplates (TiNPLs), and b) precipitates formed after 60 min reaction time in control system (calcium deficient hydroxyapatite, CaDHA) and in the presence of 100 mg L<sup>-1</sup> TiO<sub>2</sub> nanoparticles (CaDHA/TiNPs), nanotubes (CaDHA/TiNTs), nanowires (CaDHA/TiNWs), and nanoplates (CaDHA/TiNPLs).

**Table SI 3.** The percentage of fluorescence quenching and autofluorescence of different concentrations of TiO<sub>2</sub> nanoparticles (TiNPs), titanate nanotubes (TiNTs), TiO<sub>2</sub> nanowires (TiNWs), TiO<sub>2</sub> nanoplates (TiNPLs), and precipitates formed after 60 min reaction time in the control system (calcium deficient hydroxyapatite, CaDHA) and in the presence of 100 mg L<sup>-1</sup> TiO<sub>2</sub> nanoparticles (CaDHA/TiNPs), nanotubes (CaDHA/TiNTs), nanowires (CaDHA/TiNWs), and nanoplates (CaDHA/TiNPLs).

**Table SI 4.** The results of optical interference assay and adsorption assay on different concentrations of TiO<sub>2</sub> nanoparticles (TiNPs), titanate nanotubes (TiNTs), TiO<sub>2</sub> nanowires (TiNWs), TiO<sub>2</sub> nanoplates (TiNPLs), and precipitates formed after 60 min reaction time in the control system (calcium deficient hydroxyapatite, CaDHA) and in the presence of 100 mg L<sup>-1</sup> TiO<sub>2</sub> nanoparticles (CaDHA/TiNPs), nanotubes (CaDHA/TiNTs), nanowires (CaDHA/TiNWs), and nanoplates (CaDHA/TiNPLs) in hemolysis test.

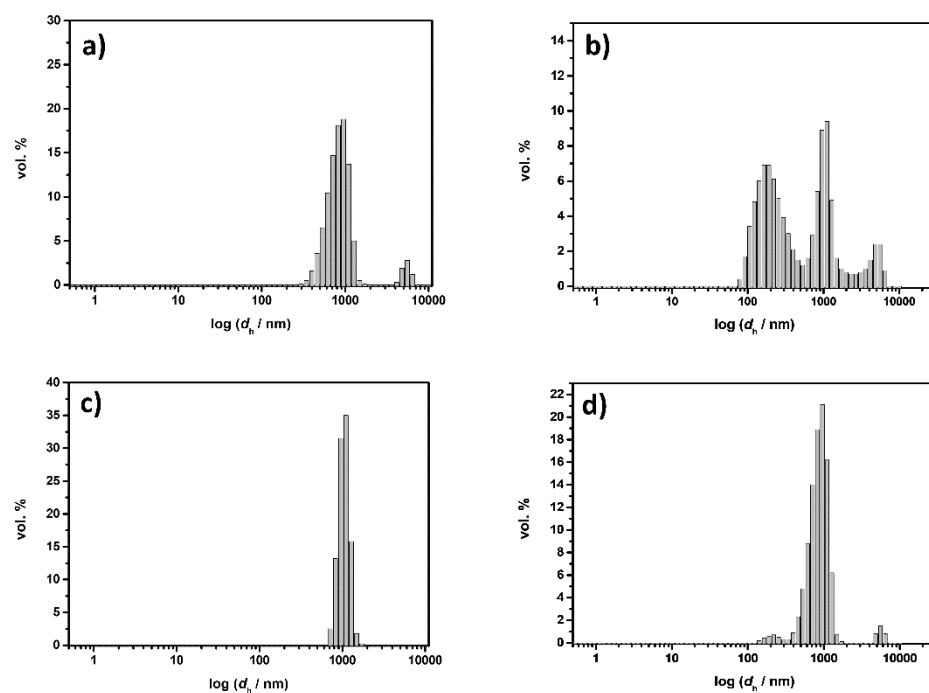

**Figure SI 1.** Volume size distributions of TiNPLs (a,b) and TiNWs (c,d) in c-SBF (a,c) and anionic reactant solution ( $c(\text{Na}_2\text{HPO}_4) = 8 \cdot 10^{-3} \text{ mol dm}^{-3}$ ,  $\text{pH}_{\text{init}} = 7.4$ ,  $\vartheta = (25.0 \pm 0.1)^\circ\text{C}$ ).

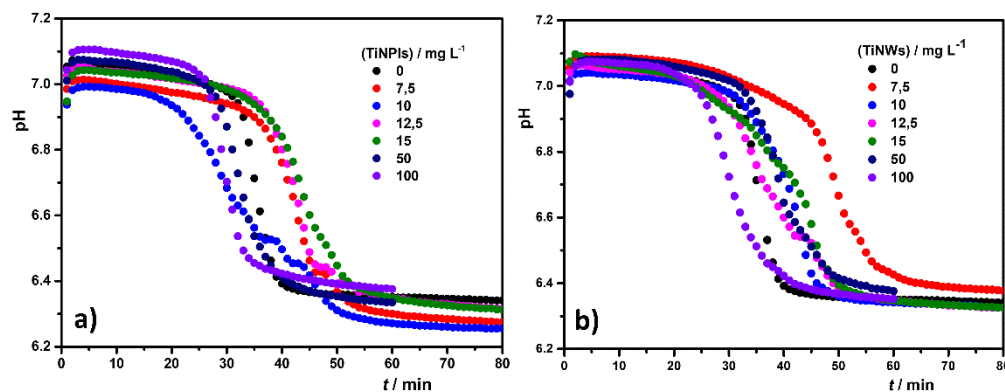

**Figure SI 2.** Representative pH *vs* time curves obtained in the control system (without TiO<sub>2</sub> nanomaterials) and in the presence of different concentrations of TiO<sub>2</sub> a) nanoplates (TiNPIs) and b) nanowires (TiNWs).  $c(\text{CaCl}_2) = c(\text{Na}_2\text{HPO}_4) = 4 \cdot 10^{-3} \text{ mol dm}^{-3}$ ,  $\text{pH}_{\text{init}} = 7.4$ ,  $\vartheta = (25 \pm 0.1) ^\circ\text{C}$ .

**Table SI 1.** Average induction time obtained from pH *vs* time curves from 3 measurements with standard deviations in the control system (without TiO<sub>2</sub> nanomaterials) and in the presence of different concentrations of TiO<sub>2</sub> nanoplates (TiNPIs) and nanowires (TiNWs).  $c(\text{CaCl}_2) = c(\text{Na}_2\text{HPO}_4) = 4 \cdot 10^{-3} \text{ mol dm}^{-3}$ ,  $\text{pH}_{\text{init}} = 7.4$ ,  $\vartheta = (25.0 \pm 0.1) ^\circ\text{C}$ .

| $\gamma / \text{mg L}^{-1}$ | $t_{\text{ind}} / \text{min}$ |                 |
|-----------------------------|-------------------------------|-----------------|
|                             | TiNPIs                        | TiNWs           |
| 0                           | $29.4 \pm 3.2$                |                 |
| 7.5                         | $36.4 \pm 2.0$                | $36.4 \pm 4.0$  |
| 10.0                        | $35.0 \pm 4.8$                | $33.7 \pm 2.4$  |
| 12.5                        | $35.8 \pm 2.7$                | $24.1 \pm 4.5$  |
| 15.0                        | $36.1 \pm 1.0$                | $36.9 \pm 2.3$  |
| 50.0                        | $27.1 \pm 0.6$                | $29.2 \pm 1.34$ |
| 100.0                       | $25.3 \pm 0.9$                | $23.2 \pm 1.6$  |

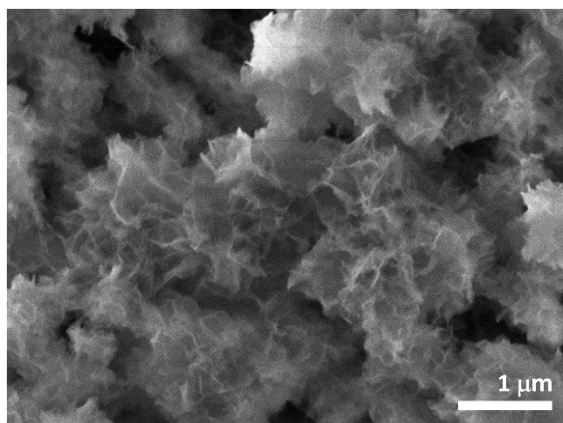

**Figure SI 3.** SEM micrographs of the calcium deficient hydroxyapatite (CaDHA) formed in control system after 60 min reaction time.  $c(\text{CaCl}_2) = c(\text{Na}_2\text{HPO}_4) = 4 \cdot 10^{-3} \text{ mol dm}^{-3}$ ,  $\text{pH}_{\text{init}} = 7.4$ ,  $\vartheta = (25 \pm 0.1) ^\circ\text{C}$ .

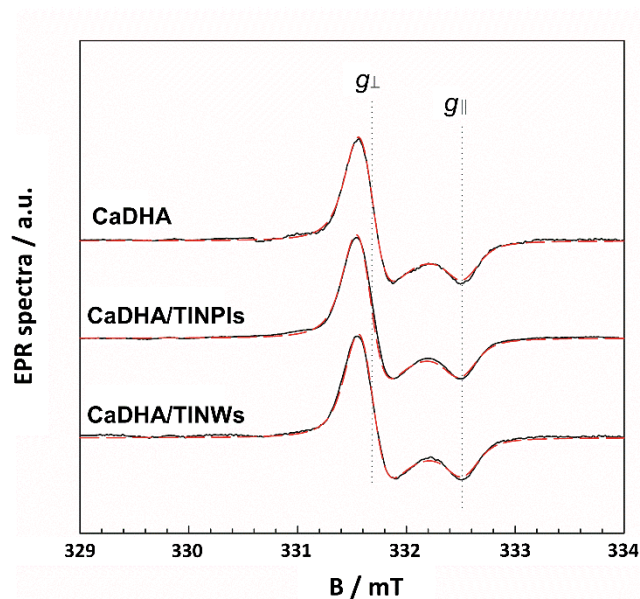

**Figure SI 4.** Simulated (red) and experimental (dark) EPR spectra of gamma irradiated precipitates formed after 60 min reaction time in the control system (calcium deficient hydroxyapatite, CaDHA) and in the presence of 100 mg L<sup>-1</sup> TiO<sub>2</sub> nanoplates (CaDHA/TiNPIs), and nanowires (CaDHA/TiNWs). Extracted spectral parameters are listed in Table SI 2.

**Table SI 2.** EPR spectral parameters extracted by simulation of experimental spectra according to Figures 8 and SI 4 for precipitates formed after 60 min reaction time in the control system (calcium deficient hydroxyapatite, CaDHA) and in the presence of 100 mg L<sup>-1</sup> TiO<sub>2</sub> nanoplates (CaDHA/TiNPIs), and nanowires (CaDHA/TiNWs).

| Sample       | $g_{\perp}$ | $g_{\parallel}$ | $\Delta H_{Gpp}^*$ | $\Delta H_{Lpp}^*$ |
|--------------|-------------|-----------------|--------------------|--------------------|
| CaDHA        | 2.0025      | 1.9972          | 0.186              | 0.125              |
| CaDHA/TiNPIs | 2.0025      | 1.9971          | 0.186              | 0.127              |
| CaDHA/TiNWs  | 2.0026      | 1.9972          | 0.186              | 0.126              |

\*The determined line widths refer to peak-to-peak Gaussian,  $\Delta H_{Gpp}$  and Lorentzian,  $\Delta H_{Lpp}$  line shape

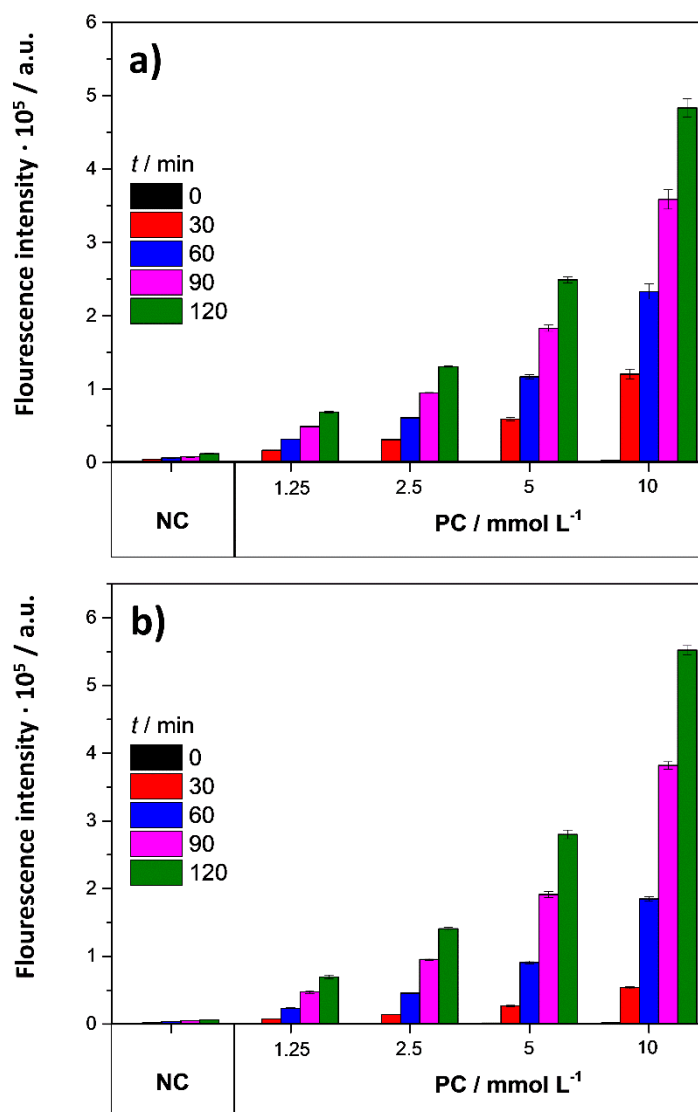

**Figure SI 5.** The intensity of DCF fluorescence after incubation in PBS with different concentrations of SIN-1 (NC – negative control; PC – positive control) used for comparison with a) TiO<sub>2</sub> nanoparticles (TiNPs), titanate nanotubes (TiNTs), TiO<sub>2</sub> nanowires (TiNWs), and TiO<sub>2</sub> nanoplates (TiNPLs), and b) precipitates formed after 60 min of reaction time in the control system (calcium deficient hydroxyapatite, CaDHA) and in the presence of 100 mg L<sup>-1</sup> TiO<sub>2</sub> nanoparticles (CaDHA/TiNPs), nanotubes (CaDHA/TiNTs), nanowires (CaDHA/TiNWs), and nanoplates (CaDHA/TiNPLs).

**Table SI 3.** The percentage of fluorescence quenching and autofluorescence of different concentrations of TiO<sub>2</sub> nanoparticles (TiNPs), titanate nanotubes (TiNTs), TiO<sub>2</sub> nanowires (TiNWs), TiO<sub>2</sub> nanoplates (TiNPIs), and precipitates formed after 60 min reaction time in the control system (calcium deficient hydroxyapatite, CaDHA) and in the presence of 100 mg L<sup>-1</sup> TiO<sub>2</sub> nanoparticles (CaDHA/TiNPs), nanotubes (CaDHA/TiNTs), nanowires (CaDHA/TiNWs), and nanoplates (CaDHA/TiNPIs).

| Nanomaterial | Concentration /<br>mg L <sup>-1</sup> | %<br>quenching | %<br>autofluorescence |
|--------------|---------------------------------------|----------------|-----------------------|
| TiNPs        | 10                                    | 0%             | 102%                  |
|              | 100                                   | 5%             | 81%                   |
|              | 500                                   | 11%            | 86%                   |
| TiNTs        | 10                                    | 1%             | 101%                  |
|              | 100                                   | 11%            | 73%                   |
|              | 500                                   | 14%            | 67%                   |
| TiNWs        | 10                                    | 5%             | 227%                  |
|              | 100                                   | 23%            | 68%                   |
|              | 500                                   | 31%            | 75%                   |
| TiNPIs       | 10                                    | 1%             | 106%                  |
|              | 100                                   | 3%             | 97%                   |
|              | 500                                   | 6%             | 81%                   |
| CaDHA        | 10                                    | 4%             | 106%                  |
|              | 100                                   | 16%            | 71%                   |
|              | 500                                   | 21%            | 32%                   |
| CaDHA/TiNPs  | 10                                    | 1%             | 117%                  |
|              | 100                                   | 17%            | 53%                   |
|              | 500                                   | 31%            | 17%                   |
| CaDHA/TiNTs  | 10                                    | 1%             | 113%                  |
|              | 100                                   | 12%            | 71%                   |
|              | 500                                   | 27%            | 55%                   |
| CaDHA/TiNWs  | 10                                    | 5%             | 99%                   |
|              | 100                                   | 26%            | 31%                   |
|              | 500                                   | 30%            | 14%                   |
| CaDHA/TiNPIs | 10                                    | 5%             | 104%                  |
|              | 100                                   | 15%            | 59%                   |
|              | 500                                   | 32%            | 18%                   |



**Table SI 4.** The results of optical interference assay and adsorption assay on different concentrations of TiO<sub>2</sub> nanoparticles (TiNPs), titanate nanotubes (TiNTs), TiO<sub>2</sub> nanowires (TiNWs), TiO<sub>2</sub> nanoplates (TiNPIs), and precipitates formed after 60 min reaction time in control system (calcium deficient hydroxyapatite, CaDHA) and in the presence of 100 mg L<sup>-1</sup> TiO<sub>2</sub> nanoparticles (CaDHA/TiNPs), nanotubes (CaDHA/TiNTs), nanowires (CaDHA/TiNWs), and nanoplates (CaDHA/TiNPIs) in hemolysis test.

| Material                  | Concentration (mg/L) | % absorbance (optical interference test) | % Hb recovery (adsorption test) |
|---------------------------|----------------------|------------------------------------------|---------------------------------|
| Blank (PBS)               |                      | 100.00 ± 0.79%                           | 100.00 ± 2.47%                  |
| Negative control (PEG)    |                      | N.A.                                     | N.A.                            |
| Positive control (Triton) |                      | N.A.                                     | N.A.                            |
| TiNPs                     | 10                   | 98.73 ± 10.06%                           | 87.21 ± 5.49%                   |
|                           | 100                  | 88.37 ± 10.40%                           | 89.04 ± 5.61%                   |
|                           | 500                  | 100.61 ± 2.42%                           | 98.30 ± 2.22%                   |
| TiNTs                     | 10                   | 96.30 ± 0.60%                            | 97.78 ± 2.30%                   |
|                           | 100                  | 96.42 ± 6.39%                            | 100.09 ± 1.82%                  |
|                           | 500                  | 107.33 ± 5.72%                           | 98.99 ± 0.02%                   |
| TiNWs                     | 10                   | 97.93 ± 4.93%                            | 106.27 ± 7.25%                  |
|                           | 100                  | 105.51 ± 3.68%                           | 104.00 ± 1.76%                  |
|                           | 500                  | 101.38 ± 3.17%                           | 99.61 ± 1.11%                   |
| TiNPIs                    | 10                   | 96.49 ± 4.20%                            | 95.73 ± 0.45%                   |
|                           | 100                  | 100.67 ± 7.02%                           | 94.44 ± 7.52%                   |
|                           | 500                  | 94.36 ± 7.91%                            | 100.15 ± 2.92%                  |
| CaDHA                     | 10                   | 98.96 ± 0.58%                            | 107.88 ± 9.39%                  |
|                           | 100                  | 101.49 ± 2.18%                           | 104.46 ± 5.78%                  |
|                           | 500                  | 100.98 ± 0.88%                           | 104.52 ± 5.04%                  |
| CaDHA/TiNPs               | 10                   | 99.72 ± 1.14%                            | 85.72 ± 7.00%                   |
|                           | 100                  | 108.46 ± 7.31%                           | 99.71 ± 2.68%                   |
|                           | 500                  | 101.44 ± 2.15%                           | 97.09 ± 1.66%                   |
| CaDHA/TiNTs               | 10                   | 99.93 ± 1.12%                            | 93.14 ± 4.16%                   |
|                           | 100                  | 102.63 ± 1.66%                           | 94.33 ± 5.62%                   |
|                           | 500                  | 106.04 ± 4.64%                           | 98.04 ± 0.55%                   |
| CaDHA/TiNWs               | 10                   | 100.61 ± 1.52%                           | 106.14 ± 3.21%                  |
|                           | 100                  | 104.66 ± 5.03%                           | 95.19 ± 1.80%                   |
|                           | 500                  | 111.54 ± 9.69%                           | 101.74 ± 0.68%                  |
| CaDHA/TiNPIs              | 10                   | 100.73 ± 0.93%                           | 107.91 ± 5.07%                  |
|                           | 100                  | 107.18 ± 1.65%                           | 92.96 ± 1.91%                   |
|                           | 500                  | 104.49 ± 1.93%                           | 106.54 ± 5.17%                  |
